# Supplementary material for: Understanding resistances in capacitive deionization devices
Source: Royal Society of Chemistry journal article supplement (doi:10.1039/d0ew00169d), 2020-01-01
Supplement: d0ew00169d1.pdf [file d0ew00169d1.pdf]

# Supplementary Material: Understanding Resistances in Capacitive Deionization Devices

Helen A. Kuo,<sup>†</sup> Ashwin Ramachandran,<sup>‡</sup> Diego I. Oyarzun,<sup>†</sup> Erica C. Clevenger,<sup>†</sup>  
Juan G. Santiago,<sup>¶</sup> Michael Stadermann,<sup>†</sup> Patrick G. Campbell,<sup>†</sup> and Steven A.  
Hawks<sup>\*,†</sup>

<sup>†</sup>*Lawrence Livermore National Laboratory, 7000 East Avenue, Livermore, CA 94550, United States*

<sup>‡</sup>*Department of Aeronautics & Astronautics, Stanford University, Stanford, CA 94305, United  
States*

<sup>¶</sup>*Department of Mechanical Engineering, Stanford University, Stanford, CA 94305, United States*

E-mail: hawks3@llnl.gov

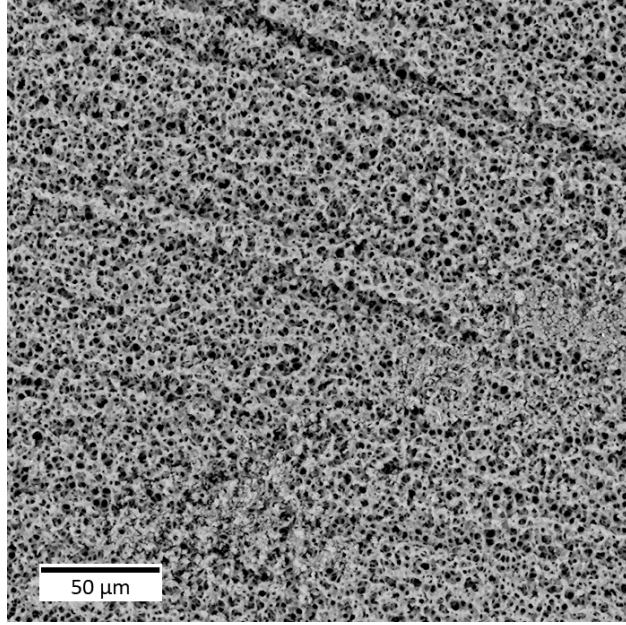

Figure S1: A SEM image of activated HCAM electrode material. The image shows the 355  $\mu\text{m}$  thick electrode.

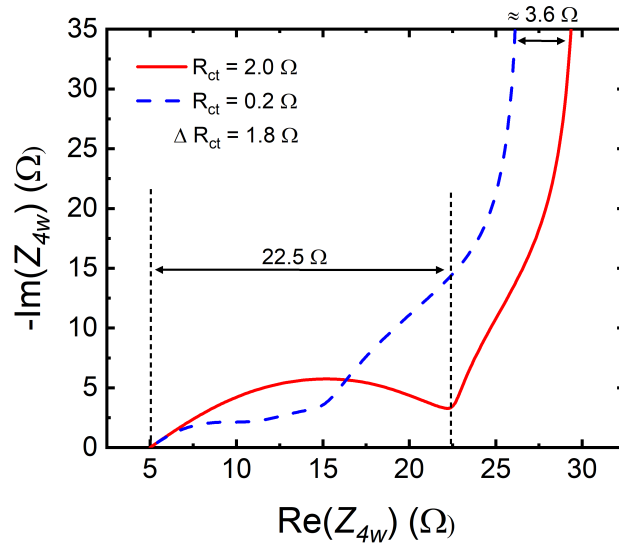

Figure S2: Calculated impedance of an EIS cell with  $R_{iER} + R_{SP} = 5 \Omega$ ,  $R_{st} = 2 \Omega$ ,  $\tau_{st} = 12 \text{ s}$ ,  $R_{mA} = 30 \Omega$ ,  $C_w = 0.15$ ,  $n = 0.5$ , and  $R_{ct}$  as shown. Though the arc at low frequencies grows drastically with an increase in charge transfer resistance, the total cell resistance  $R_{4w}$  only increases by  $2R_{ct}$  as predicted by the model (the factor of 2 comes from the fact that there are two electrodes).

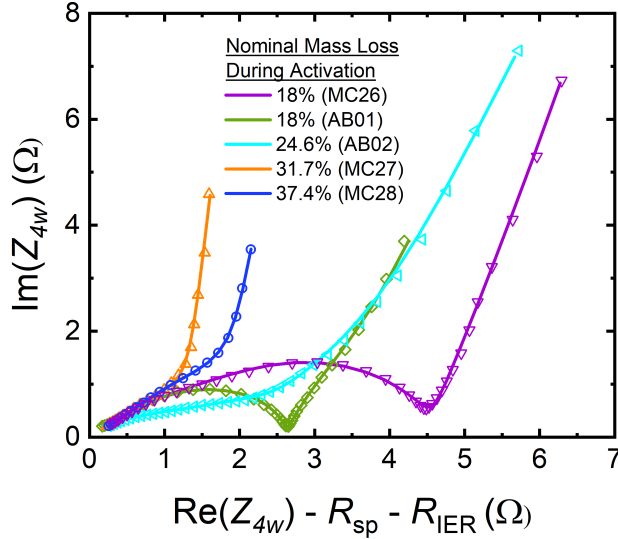

Figure S3: EIS spectra from  $4 \times 5.6$  cm two electrode cells in 20mM NaCl with fits from Eqns (3-5). Open symbols are experimental data and lines are fits. The cells were assembled from HCAM electrodes with different levels of activation, measured as mass loss.  $R_{ct}$  values from the fits were less than  $0.1\Omega$  for all but the 18% activation samples and the charge transfer is not visible for the higher activation samples.

**Table S1: Impedance Fitting Parameters**

|                 | $R_{sp} + R_{IER}$ ( $\Omega$ ) | $R_{mA}$ ( $\Omega$ )     | $C_w$ (F) | $R_{ct}$ ( $\Omega$ ) | $R_{st}$ ( $\Omega$ ) | $\tau_{st}$ (s) | $n$             |
|-----------------|---------------------------------|---------------------------|-----------|-----------------------|-----------------------|-----------------|-----------------|
| 50 mM NaCl      | $1.11 \pm 0.03$                 | $7.6 \pm 0.2$             | 0.12      | $0.05 \pm 0.05$       | $0.10 \pm 0.04$       | $0.87 \pm 0.38$ | $0.42 \pm 0.01$ |
| 100 mM NaCl     | $0.62 \pm 0.08$                 | $3.9 \pm 0.3$             | 0.12      | $0.03 \pm 0.03$       | $0.06 \pm 0.05$       | $0.61 \pm 0.51$ | $0.43 \pm 0.01$ |
| 200 mM NaCl     | $0.37 \pm 0.07$                 | $2.3 \pm 0.1$             | 0.15      | $0.01 \pm 0.04$       | $0.05 \pm 0.06$       | $0.73 \pm 0.92$ | $0.46 \pm 0.01$ |
| 500 mM NaCl     | $0.20 \pm 0.05$                 | $1.1 \pm 0.1$             | 0.19      | $0.005 \pm 0.03$      | $0.03 \pm 0.05$       | $0.65 \pm 0.91$ | $0.49 \pm 0.01$ |
| 2000 mM NaCl*   | $0.09 \pm 11.0$                 | $3 \times 10^{-5} \pm 16$ | 0.006     | $0.03 \pm 0.14$       | $0.33 \pm 0.01$       | $7.7 \pm 0.3$   | $0.49 \pm 0.01$ |
| 15 mM NaF       | $3.85 \pm 0.09$                 | $38 \pm 7$                | 0.15      | $0.90 \pm 0.18$       | $3.0 \pm 0.5$         | $13.5 \pm 3.8$  | $0.38 \pm 0.02$ |
| 15 mM NaBr      | $3.27 \pm 0.04$                 | $23 \pm 2$                | 0.14      | $0.54 \pm 0.05$       | $1.3 \pm 0.1$         | $9.1 \pm 1.3$   | $0.38 \pm 0.01$ |
| 15 mM NaCl      | $3.33 \pm 0.04$                 | $29 \pm 4$                | 0.16      | $0.76 \pm 0.12$       | $1.3 \pm 0.2$         | $8.1 \pm 2.2$   | $0.39 \pm 0.01$ |
| 18% act cell 1* | $3.4 \pm 0.2$                   | $2.8 \pm 1.0$             | 0.037     | $1.4 \pm 1.7$         | $0.25 \pm 0.08$       | $0.4 \pm 22$    | $0.42 \pm 0.01$ |
| 18% act cell 2* | $1.17 \pm 0.05$                 | $4.1 \pm 0.7$             | 0.041     | $0.4 \pm 0.7$         | $0.0017 \pm 16$       | $0.008 \pm 76$  | $0.42 \pm 0.02$ |
| 24.6% act       | $1.4 \pm 0.5$                   | $4.2 \pm 1.0$             | 0.076     | $0.0005 \pm 0.0090$   | $0.5 \pm 1.0$         | $5.9 \pm 5.6$   | $0.40 \pm 0.03$ |
| 31.7% act*      | $1.87 \pm 0.07$                 | $1.9 \pm 0.2$             | 0         | $0.0001 \pm 0.0026$   | $0.003 \pm 1.016$     | $0.03 \pm 11$   | $0.48 \pm 0.04$ |
| 37.4% act*      | $0.88 \pm 0.10$                 | $2.8 \pm 0.1$             | 0         | $0.0002 \pm 0.0079$   | $0.002 \pm 0.192$     | $0.04 \pm 2.6$  | $0.48 \pm 0.05$ |

Unless otherwise noted, electrodes were activated to 18% mass loss and were tested in 20 mM NaCl.

\* The impedance data was fit using a modified equivalent circuit in which the wall capacitive component was replaced with a constant phase element such that Eqn. 4 becomes

$Z_w = \left( C_w (i\omega)^{n_2} + \frac{1}{R_{ct} + Z_s} \right)^{-1}$ .  $n_2 = 0.89, 0.90, 0.98, 2 \times 10^{-5}$  and 0.06 for the 2000 mM, 18% cell 1, 18% cell 2, 31.7%, and 37.4% samples respectively. For all other fits  $n_2 = 1$  so Eqn. 4 holds as originally written.

# Parameter Definitions

Below is a table of the parameters used in the main text and SI along with their corresponding definitions and typical units.

**Table S2: Parameter Definitions**

| Parameter Symbol | Definition                                                                                                                                       | Typical Unit                     |
|------------------|--------------------------------------------------------------------------------------------------------------------------------------------------|----------------------------------|
| $Z_{2w}$         | cell impedance as measured in a 2-wire mode                                                                                                      | $\Omega$ or $\Omega\text{-cm}^2$ |
| $Z_{EEI}$        | external electronic impedance; includes external wires, contact between electrodes and current collectors, and current collector resistance      | $\Omega$ or $\Omega\text{-cm}^2$ |
| $Z_{4w}$         | cell impedance excluding external wires and contacts as measured in a 4-wire mode                                                                | $\Omega$ or $\Omega\text{-cm}^2$ |
| $R_{EER,s}$      | series component of the external electronic impedance                                                                                            | $\Omega$ or $\Omega\text{-cm}^2$ |
| $R_{contact}$    | resistance of the contacts between the current collector and electrode                                                                           | $\Omega$ or $\Omega\text{-cm}^2$ |
| $\omega$         | angular frequency of applied voltage                                                                                                             | rad/s                            |
| $C_{contact}$    | capacitance of the contacts between electrodes and current collectors                                                                            | F                                |
| $R_{IER}$        | internal electronic resistance as measured in 4-wire mode, largely due to solid electrode resistance perpendicular to the applied electric field | $\Omega$ or $\Omega\text{-cm}^2$ |
| $R_{sp}$         | ionic resistance within the separator                                                                                                            | $\Omega$ or $\Omega\text{-cm}^2$ |
| $R_{mA}$         | ionic resistance of macropores in the electrode                                                                                                  | $\Omega$ or $\Omega\text{-cm}^2$ |
| $Z_w$            | macropore wall impedance                                                                                                                         | $\Omega$ or $\Omega\text{-cm}^2$ |
| $C_w$            | macropore wall capacitance                                                                                                                       | F                                |
| $R_{ct}$         | internal ionic-transfer resistance*                                                                                                              | $\Omega$ or $\Omega\text{-cm}^2$ |
| $Z_{st}$         | storage pore impedance                                                                                                                           | $\Omega$ or $\Omega\text{-cm}^2$ |
| $R_{st}$         | storage pore resistance                                                                                                                          | $\Omega$ or $\Omega\text{-cm}^2$ |
| $\tau_{st}$      | storage pore characteristic time; $\tau_{st} = R_{st} C_{st}$                                                                                    | s                                |
| $n$              | anomalous diffusion order parameter                                                                                                              | —                                |
| $R_{2w}$         | cell resistance as measured in a 2-wire setup; $R_{2w} = \max[\text{Re}(Z_{2w})]$                                                                | $\Omega$ or $\Omega\text{-cm}^2$ |
| $R_{4w}$         | cell resistance as measured in a 4-wire setup; $R_{4w} = \max[\text{Re}(Z_{4w})]$                                                                | $\Omega$ or $\Omega\text{-cm}^2$ |
| $R_{EER}$        | external electronic resistance<br>$R_{EER} = \max[\text{Re}(Z_{EEI})] = R_{EER,s} + R_{contact} = R_{2w} - R_{4w}$                               | $\Omega$ or $\Omega\text{-cm}^2$ |
| $R_{el}$         | resistance of one electrode                                                                                                                      | $\Omega$ or $\Omega\text{-cm}^2$ |
| $l_{sp}$         | thickness of the separator                                                                                                                       | $\mu\text{m}$                    |
| $\tau_{sp}$      | separator tortuosity                                                                                                                             | —                                |
| $A$              | electrode face area                                                                                                                              | $\text{cm}^2$                    |
| $\kappa$         | electrolyte conductivity                                                                                                                         | mS/cm                            |
| $p_{sp}$         | porosity of separator                                                                                                                            | —                                |
| $l_{el}$         | electrode thickness                                                                                                                              | $\mu\text{m}$                    |
| $\tau_{mA}$      | electrode macropore tortuosity                                                                                                                   | —                                |
| $p_{mA}$         | electrode macroporosity                                                                                                                          | —                                |
| $\sigma$         | electrode conductivity; here $22 \pm 8 \text{ S/cm} = \sigma \gg \kappa$                                                                         | S/cm                             |
| $R_s$            | series resistance; defined as the high frequency intercept of the 2-wire impedance with the real axis                                            | $\Omega$ or $\Omega\text{-cm}^2$ |

\*Some work uses  $R_{ct}$  to refer to contact resistance but here  $R_{ct}$  is only used in reference to internal ionic-transfer resistance.<sup>1</sup>

The parameters used here can be related to resistance terms commonly seen in the literature by the following equations.

$$R_s = R_{sp} + R_{IER} + R_{EER} \quad (\text{S1})$$

$$R_{EER} = R_{contact} + R_{EER,S} \quad (\text{S2})$$

Note that in the past, internal and external electronic resistances have been combined into one electronic resistance term; however this is impractical when comparing two- and four-wire measurements as is done here. Here, external electronic resistance is that due to wires, contacts, and current collectors and this resistance can be removed from measurements by using a 4-wire measurement mode. The internal electronic resistance remains even in 4-wire measurements and is due to features such as the solid electrode electronic resistance.

## References

- (1) Qu, Y.; Baumann, T. F.; Santiago, J. G.; Stadermann, M. Characterization of Resistances of a Capacitive Deionization System. *Environ. Sci. Technol.* **2015**, *49*, 9699–9706.
